# Supplementary material
Source: publisher figshare collection journal article supplement (https://rs.figshare.com/ndownloader/files/11867936)
Supplement: Supplementary file 1 [file 11867936]

## Sheet: MigrationExperiment
Sex	SVL	Gape	Jaw Length	Head Depth	Tank	Treatment	Status
F	55.21	8.16	6.95	4.98	2	HighDensity	Migrate
F	50.23	7.4	6.63	4.54	1	LowDensity	Resident
F	49.72	7.64	6.31	4.44	2	HighDensity	Dead
F	50.29	7.73	6	4.3	2	HighDensity	Migrate
M	48.97	7.66	6.18	4.58	2	HighDensity	Migrate
F	51.76	8.1	7.4	4.24	1	LowDensity	Resident
M	51.13	7.88	7.45	4.6	2	HighDensity	Migrate
M	48.31	7.65	6.23	4.37	4	LowDensity	Migrate
M	46.69	7.78	5.94	4.77	2	HighDensity	Resident
M	48.2	7.31	6.86	4.39	2	HighDensity	Resident
M	46.51	7.37	6.21	4.78	1	LowDensity	Resident
F	49.64	7.94	6.17	4.51	4	LowDensity	Resident
M	48.93	7.67	6.55	4.6	2	HighDensity	Migrate
F	50.97	8.54	6.13	4.5	4	LowDensity	Migrate
F	51.18	8.08	6.65	4.2	2	HighDensity	Resident
M	50.08	7.68	7.07	4.37	3	LowDensity	Resident
M	44.98	7.48	6.44	4.24	1	LowDensity	Dead
M	51.27	7.67	6.38	4.67	3	LowDensity	Migrate
F	53.13	8.56	6.17	4.72	2	HighDensity	Migrate
M	53.32	8.22	6.86	4.74	1	LowDensity	Migrate
M	49.54	8.14	6.53	4.33	2	HighDensity	Migrate
M	42.04	6.71	6.21	4.09	1	LowDensity	Migrate
F	45	7.28	6.21	4.17	2	HighDensity	Migrate
F	54.41	8.14	6.75	4.81	3	LowDensity	Resident
M	48.29	6.9	6.16	4.45	2	HighDensity	Migrate
F	53.21	8.65	6.52	4.47	2	HighDensity	Migrate
F	54.7	8.34	6.58	4.7	2	HighDensity	Migrate
M	47.5	7.07	6.53	4.21	3	LowDensity	Migrate
M	51.66	7.93	6.72	4.78	2	HighDensity	Migrate
M	49.44	8.28	6.65	4.54	2	HighDensity	Migrate
F	57.26	8.79	6.67	5.02	2	HighDensity	Migrate
F	44.12	7.28	5.4	3.68	3	LowDensity	Resident
F	55.92	8.97	6.81	4.68	2	HighDensity	Resident
M	46.63	7.35	6.45	4.34	2	HighDensity	Resident
M	51.03	8.29	6.93	4.83	4	LowDensity	Resident
F	47.91	7.56	6.69	4.37	3	LowDensity	Migrate
M	50.28	7.68	7.05	4.73	2	HighDensity	Migrate
F	50.79	8.26	6.46	4.27	1	LowDensity	Migrate
F	50.83	7.75	6.54	4.57	2	HighDensity	Resident
F	49.43	7.87	6.03	4.26	3	LowDensity	Resident
M	45.35	7.02	6.1	4.2	4	LowDensity	Resident
F	41.24	6.73	5.82	4.02	2	HighDensity	Resident
M	52.59	8.06	6.1	4.81	2	HighDensity	Resident
M	46.62	7.09	6.62	4.36	4	LowDensity	Migrate
M	52.12	7.55	7.13	4.55	4	LowDensity	Migrate
F	55.25	8.75	6.23	5.02	2	HighDensity	Migrate
M	50.05	7.38	7	4.64	3	LowDensity	Resident
F	52.28	8.2	5.83	4.77	1	LowDensity	Resident
M	43.21	6.79	5.92	4.18	2	HighDensity	Migrate
F	47.13	8.56	6.89	4.85	4	LowDensity	Resident
M	48.29	7.36	5.9	4.39	2	HighDensity	Resident
F	53.57	8.47	5.96	4.8	4	LowDensity	Migrate
F	47.16	7.46	6.44	4.28	1	LowDensity	Resident
M	41.12	6.25	5.77	4.06	2	HighDensity	Migrate
M	50.7	7.34	6.13	4.56	1	LowDensity	Resident
F	47.41	7.67	6.4	4.32	3	LowDensity	Resident
F	43.55	6.44	5.61	3.98	2	HighDensity	Migrate
F	49.06	7.39	6.01	4.32	4	LowDensity	Migrate
M	45.92	7.37	5.56	4.33	3	LowDensity	Resident
F	54.9	8.11	6.05	4.69	2	HighDensity	Resident
M	56	7.06	7.7	4.64	16	HighDensity	Migrate
M	48	7.42	6.49	4.31	13	LowDensity	Dead
M	47.36	7.13	6.42	4.33	16	HighDensity	Migrate
F	47.31	7.69	6.14	4.22	6	HighDensity	Migrate
M	38.98	5.93	6	3.67	12	LowDensity	Migrate
M	45.73	6.82	6.4	4.08	6	HighDensity	Migrate
M	45.73	6.53	6.45	4.11	16	HighDensity	Dead
M	48.25	6.9	6.43	4.5	6	HighDensity	Migrate
F	35.57	5.74	5.09	3.2	7	LowDensity	Dead
M	44.04	6.79	6.4	3.83	5	LowDensity	Resident
M	39.82	6.41	6.21	3.91	6	HighDensity	Migrate
F	41.21	6.94	5.95	3.8	8	LowDensity	Dead
M	40.93	6.6	6	3.87	16	HighDensity	Migrate
M	42.6	6.78	6.43	4.03	9	HighDensity	Migrate
F	42.54	7.51	6.11	3.81	10	LowDensity	Migrate
M	39.53	6.49	5.72	3.94	10	LowDensity	Migrate
M	42.13	6.82	5.68	4.02	9	HighDensity	Dead
M	41.4	6.92	5.85	4.05	6	HighDensity	Dead
F	40.33	6.37	5.98	4.14	7	LowDensity	Migrate
F	35.61	6.75	4.9	3.36	15	LowDensity	Migrate
F	44.63	7.2	6.18	4.46	10	LowDensity	Migrate
M	40.54	5.93	6.03	3.91	12	LowDensity	Dead
M	37.92	6.43	5.87	3.56	9	HighDensity	Resident
M	42.09	6.4	6.43	4.02	9	HighDensity	Migrate
M	41.71	6.58	5.8	3.71	16	HighDensity	Dead
M	40.5	5.95	6.11	3.77	8	LowDensity	Dead
M	39.31	6.5	5.35	3.85	9	HighDensity	Migrate
F	35.22	5.93	4.88	3.38	9	HighDensity	Migrate
F	51.41	8.35	6.65	4.61	6	HighDensity	Migrate
M	38.14	6.39	6.07	3.89	7	LowDensity	Resident
M	41.54	6.28	6.36	3.89	6	HighDensity	Migrate
F	49.41	7.56	6.11	4.44	6	HighDensity	Dead
M	44.42	7.38	6.65	4.12	9	HighDensity	Dead
F	41.03	6.71	6.16	3.57	6	HighDensity	Dead
F	39.78	6.69	5.92	3.65	5	LowDensity	Resident
M	38.23	6.23	5.85	3.38	15	LowDensity	Resident
M	36.59	5.97	5.74	3.42	14	LowDensity	Migrate
F	49.44	7.75	6.85	4.37	12	LowDensity	Migrate
F	48.22	7.57	6.58	4.34	12	LowDensity	Migrate
F	47.75	7.62	6.1	4.41	9	HighDensity	Dead
M	38.83	6.43	5.64	3.57	6	HighDensity	Migrate
F	40.84	6.24	6.08	3.72	16	HighDensity	Migrate
M	38.94	6.43	5.9	3.77	6	HighDensity	Migrate
M	37.09	6.06	5.52	3.28	14	LowDensity	Migrate
M	44.42	7.09	6.32	4	7	LowDensity	Dead
M	40.78	6.67	6.01	3.63	10	LowDensity	Migrate
F	54.12	8.39	6.98	4.95	9	HighDensity	Dead
F	50.16	8.14	6.95	4.63	16	HighDensity	Migrate
F	50.88	8.09	6.92	4.67	9	HighDensity	Resident
F	48.37	7.16	6.42	4.5	6	HighDensity	Migrate
F	42.26	6.92	6.59	3.88	16	HighDensity	Dead
F	46.39	7.36	6.17	4.02	13	LowDensity	Migrate
F	42.34	6.53	5.82	4.3	10	LowDensity	Migrate
F	49.38	7.52	6.23	3.99	9	HighDensity	Migrate
F	40.37	6.79	6.26	3.76	11	LowDensity	Migrate
F	41.72	6.69	6.1	3.82	5	LowDensity	Resident
F	41.55	6.97	6.03	3.76	11	LowDensity	Dead
F	50.98	8.32	7.18	4.63	5	LowDensity	Migrate
F	42.08	6.74	5.79	3.53	6	HighDensity	Dead
F	49.05	8.04	6.96	4.39	10	LowDensity	Resident
F	43.1	6.58	5.99	3.61	16	HighDensity	Migrate
F	40.96	6.21	5.34	3.7	16	HighDensity	Dead
F	40.92	6.67	5.97	3.59	13	LowDensity	Migrate
M	46.6	7.27	6.26	4.39	11	LowDensity	Migrate
M	48.08	6.99	6.65	4.47	14	LowDensity	Migrate
F	43.63	6.92	5.97	3.83	6	HighDensity	Migrate
M	39.69	6.32	5.61	3.95	16	HighDensity	Dead
F	41.97	6.76	6.34	3.76	11	LowDensity	Dead
F	41.03	6.82	5.73	3.78	9	HighDensity	Migrate
M	38.27	6.3	5.64	3.74	13	LowDensity	Migrate
F	40.26	6.53	6.02	3.87	14	LowDensity	Migrate
F	39.29	6.13	5.46	3.52	16	HighDensity	Migrate
F	35.85	6.13	5.41	3.43	6	HighDensity	Migrate
F	38.79	6.68	6.14	3.59	10	LowDensity	Dead
M	38.73	6.95	6.05	3.71	6	HighDensity	Migrate
F	39.4	6.18	5.77	3.56	9	HighDensity	Dead
F	48.53	7.75	6.68	4.38	14	LowDensity	Migrate
F	39.9	6.7	5.61	3.67	9	HighDensity	Migrate
M	45.19	7.06	6.55	4.12	13	LowDensity	Migrate
M	47.57	7.31	7.32	4.46	14	LowDensity	Migrate
M	41.31	6.7	6.35	4.23	6	HighDensity	Migrate
F	51.95	8.15	6.68	4.73	9	HighDensity	Dead
F	49.65	8.27	6.41	4.49	16	HighDensity	Resident
F	46.61	7.29	6.36	4.29	6	HighDensity	Migrate
F	47.53	7.74	6.84	4.19	9	HighDensity	Migrate
F	51.52	8.1	6.52	4.31	12	LowDensity	Migrate
F	48.04	8.04	6.33	4.02	8	LowDensity	Migrate
F	48.72	8.15	6.78	4.32	6	HighDensity	Migrate
M	43.66	6.57	6	4.06	15	LowDensity	Resident
F	47.54	6.8	5.96	4.29	9	HighDensity	Migrate
M	40.84	6.52	6.03	3.66	9	HighDensity	Resident
M	41.91	6.16	5.9	3.75	9	HighDensity	Migrate
M	41.05	6.46	5.72	3.79	8	LowDensity	Migrate
F	39.39	6.79	5.84	3.92	15	LowDensity	Resident
F	33.59	6.04	5.14	3.39	6	HighDensity	Migrate
M	41.06	6.78	6.18	4.07	7	LowDensity	Migrate
F	40.2	7.17	5.39	3.93	16	HighDensity	Dead
F	47.09	7.63	6.57	4.26	16	HighDensity	Migrate
F	35.9	6.58	6.01	3.68	16	HighDensity	Migrate
F	42.58	6.96	5.83	3.81	5	LowDensity	Migrate
M	39.91	6.13	6.04	3.74	7	LowDensity	Migrate
F	48.02	8.13	6.79	4.45	15	LowDensity	Migrate
F	42.14	7	6.1	4.2	5	LowDensity	Resident
F	39.7	6.82	5.74	3.62	7	LowDensity	Dead
F	45.31	7.62	7	4.29	13	LowDensity	Resident
M	40.35	6.42	5.96	3.97	16	HighDensity	Migrate
M	43.1	7.07	5.99	4.14	16	HighDensity	Migrate
F	39.23	6.69	5.95	3.93	7	LowDensity	Migrate
F	41.9	7.13	6.08	3.87	16	HighDensity	Migrate
M	39.35	6.02	5.53	3.68	15	LowDensity	Resident
F	45.35	7.54	6.47	3.97	16	HighDensity	Migrate
F	39.74	6.62	5.56	3.77	14	LowDensity	Migrate
M	42.62	6.86	6.08	4.11	6	HighDensity	Migrate
F	40.62	6.92	6.32	3.91	16	HighDensity	Migrate
F	46.55	7.88	6.56	4.28	9	HighDensity	Migrate
F	38.72	6.24	5.56	3.74	6	HighDensity	Migrate
F	35.96	6.6	5.73	3.51	8	LowDensity	Migrate
M	39.35	6.21	6.1	3.71	10	LowDensity	Migrate
F	37.92	6.33	5.95	3.55	14	LowDensity	Migrate
M	48.08	7.2	6.51	4.48	15	LowDensity	Resident
F	44.98	7.25	6.34	4.02	15	LowDensity	Resident
F	42.63	7.05	5.51	3.64	16	HighDensity	Migrate
F	39.48	6.28	5.71	3.64	9	HighDensity	Migrate
F	38.89	6.3	5.26	3.57	6	HighDensity	Migrate
F	47.1	7.22	6.6	4.2	8	LowDensity	Dead
F	51.85	8.21	6.86	4.96	9	HighDensity	Migrate
F	40.61	6.93	5.73	3.86	13	LowDensity	Migrate
F	37.59	6.05	5.4	3.49	9	HighDensity	Migrate
M	38.47	6.45	5.85	3.66	14	LowDensity	Migrate
F	38.07	6.65	6.09	3.67	12	LowDensity	Migrate
F	49.39	8.33	7.12	4.59	6	HighDensity	Migrate
M	41.08	6.4	6.1	3.98	5	LowDensity	Resident
F	41.42	7.03	6.05	4.06	13	LowDensity	Migrate
F	39.94	6.64	5.77	3.62	8	LowDensity	Migrate
M	39.69	6.49	6.46	3.81	9	HighDensity	Migrate
F	39.58	6.48	5.93	3.85	11	LowDensity	Migrate
F	38.28	6.82	5.84	3.59	7	LowDensity	Migrate
M	43.07	7.06	5.77	4.18	8	LowDensity	Migrate
M	38.22	6.63	5.94	4	16	HighDensity	Migrate
M	46.41	7.12	6.25	4.21	12	LowDensity	Migrate
M	44.05	7.24	6.41	4.7	9	HighDensity	Migrate
M	46.22	7.41	6.7	4.01	6	HighDensity	Migrate
M	45.26	6.99	6.36	3.97	5	LowDensity	Resident
M	46.13	6.47	5.72	4.06	12	LowDensity	Migrate
M	43.36	6.96	6.17	3.9	5	LowDensity	Resident
M	39.28	6.54	6.42	3.91	16	HighDensity	Dead
M	42.81	6.84	6.24	4.16	8	LowDensity	Resident
M	44.42	7.42	6.31	4.15	16	HighDensity	Resident
M	40.99	6.39	6.29	4.25	6	HighDensity	Dead
M	37.96	5.87	6.07	3.79	6	HighDensity	Migrate
M	38.81	6.28	5.65	3.67	11	LowDensity	Resident
M	44.72	7.1	6.1	4.33	12	LowDensity	Migrate
M	41.41	6.65	6.29	4.03	16	HighDensity	Migrate
M	36.42	6.3	6.26	3.59	13	LowDensity	Dead
F	44.13	7.77	5.73	4.39	11	LowDensity	Migrate
F	47.78	8.2	6.65	4.19	6	HighDensity	Migrate
F	39.95	6.52	5.64	3.52	12	LowDensity	Resident
M	43.77	6.97	5.97	4.19	16	HighDensity	Migrate
M	38.86	6.21	6.24	3.62	13	LowDensity	Dead
F	46.93	7.79	6.81	4.47	15	LowDensity	Migrate
M	43.97	7.09	6.49	4.33	11	LowDensity	Migrate
M	42.98	6.58	5.85	3.94	15	LowDensity	Migrate
M	44.11	7.08	6.23	4.34	9	HighDensity	Migrate
M	39.45	6.98	6.62	4.15	5	LowDensity	Migrate
M	41.97	6.42	6.17	4.01	9	HighDensity	Migrate
M	39.23	6.23	6.35	3.85	11	LowDensity	Migrate
F	44.56	7.96	6.15	4.07	14	LowDensity	Migrate
M	42.72	6.91	6.76	4.06	6	HighDensity	Migrate
M	45.52	7.69	7.02	4.67	6	HighDensity	Migrate
M	37.62	6.1	6.09	3.64	16	HighDensity	Dead
M	37.17	6.22	5.95	3.76	8	LowDensity	Migrate
M	40.38	6.19	6.21	3.85	10	LowDensity	Migrate
F	39.95	6.75	5.74	3.54	16	HighDensity	Dead
M	39.85	6.55	5.96	3.8	7	LowDensity	Migrate
M	39.29	6.02	6.27	3.9	9	HighDensity	Resident
M	36.51	6.45	5.77	3.8	9	HighDensity	Migrate
M	38.63	6.38	5.94	3.85	9	HighDensity	Resident
M	43.46	7.05	6.27	4.22	10	LowDensity	Migrate
M	38.11	6.4	6.11	3.71	16	HighDensity	Dead
M	37.81	6.29	5.41	3.76	11	LowDensity	Resident

## Sheet: TradeoffExperiment
sex	treatment	tank	growth	Hue_avg
M	Limnetic	12	-0.20028	35.3333
M	Limnetic	12	-0.29204	36.3333
M	Benthic	9	0.19649	31
M	Limnetic	16	-0.26487	41.6667
M	Limnetic	13	-0.17	39.6667
F	Limnetic	7	-0.06062	37.3333
F	Limnetic	13	-0.21967	30.3333
M	Benthic	15	0.18038	31
F	Benthic	18	0.33767	26.6667
F	Benthic	19	0.39796	32.3333
M	Limnetic	13	-0.02425	34
M	Benthic	15	0.15044	34
M	Limnetic	10	0.02656	37
M	Benthic	23	0.18232	29.6667
M	Benthic	14	0.23819	31
M	Benthic	3	0.45027	31.6667
M	Benthic	3	0.35098	37
M	Benthic	18	0.40076	28
F	Benthic	15	0.10343	30
F	Limnetic	16	-0.11661	41
F	Benthic	14	0.2069	33.3333
F	Benthic	3	0.36755	32.6667
M	Benthic	19	0.06828	29
M	Limnetic	11	-0.27153	37.6667
M	Benthic	14	0.24443	32.3333
F	Benthic	9	0.38279	36
M	Benthic	9	0.29581	35.6667
F	Benthic	18	0.49696	29.6667
M	Benthic	5	0.24076	28
F	Limnetic	13	-0.22494	38.6667
F	Benthic	15	0.35001	28.6667
F	Benthic	14	0.29965	32
F	Benthic	3	0.38271	30.6667
M	Limnetic	7	-0.28184	33.3333
M	Benthic	8	0.09396	31
M	Limnetic	6	-0.27699	35.6667
F	Limnetic	12	-0.24627	37.3333
F	Limnetic	10	-0.19129	39.3333
M	Benthic	5	0.08769	26.6667
F	Benthic	9	0.35279	32
F	Limnetic	6	-0.2954	38
F	Limnetic	10	-0.14127	37
M	Benthic	18	0.16391	28.6667
F	Benthic	19	0.11969	29
M	Limnetic	10	0.03685	40.6667
M	Benthic	19	0.08927	25.3333
M	Limnetic	4	-0.05537	33
F	Limnetic	7	-0.31574	38.6667
F	Limnetic	4	-0.26972	29.3333
F	Limnetic	24	-0.28102	38
M	Limnetic	6	0.0154	39
F	Benthic	23	-0.00717	26
F	Benthic	5	0.06735	28.6667
F	Limnetic	6	-0.27962	39.3333
F	Benthic	23	0.10262	28
F	Benthic	8	0.17294	31.3333
M	Benthic	23	0.07079	26
F	Benthic	8	-0.00239	30.6667
F	Benthic	5	0.06332	32
